# Supplementary material for: Marked inducing effects of metal oxide supports on the hydrothermal stability of zeolitic imidazolate framework (ZIF) membranes
Source: Royal Society of Chemistry journal article supplement (doi:10.1039/c5ta10190e), 2016-01-01
Supplement: c5ta10190e1.pdf [file c5ta10190e1.pdf]

## Supplementary Information

**Figure S1** Permeance and selectivity evolution of ZIF-7 membrane under thermal activation.

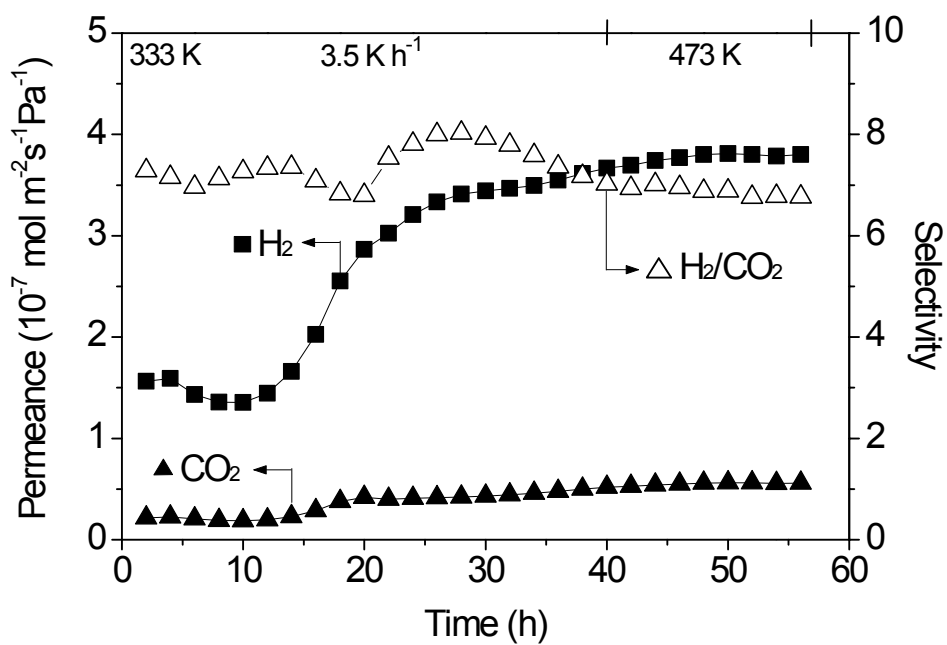

**Table S1** Gas permeance and activation energy of permeation through the ZIF-7 membrane evaluated using single gas (top) and equimolar mixed gas feed (bottom).

|                                      | Gas             | Permeance ( $10^{-7}$ mol m <sup>-2</sup> s <sup>-1</sup> Pa <sup>-1</sup> ) |       |       |       | Activation energy (kJ mol <sup>-1</sup> K <sup>-1</sup> ) |
|--------------------------------------|-----------------|------------------------------------------------------------------------------|-------|-------|-------|-----------------------------------------------------------|
|                                      |                 | 423 K                                                                        | 473 K | 523 K | 573 K |                                                           |
| Single gas permeance test            | H <sub>2</sub>  | 3.2                                                                          | 3.4   | 3.7   | 4.0   | 1.3                                                       |
|                                      | CO              | 0.4                                                                          | 0.4   | 0.4   | 0.4   | 0.8                                                       |
|                                      | CH <sub>4</sub> | 0.4                                                                          | 0.4   | 0.4   | 0.4   | 0.6                                                       |
|                                      | CO <sub>2</sub> | 0.5                                                                          | 0.5   | 0.4   | 0.4   | -0.8                                                      |
| Mixed gas permeance test (equimolar) | H <sub>2</sub>  | 2.8                                                                          | 3.0   | 3.3   | 3.6   | 1.5                                                       |
|                                      | CO              | 0.4                                                                          | 0.4   | 0.4   | 0.5   | 0.9                                                       |
|                                      | CH <sub>4</sub> | 0.4                                                                          | 0.4   | 0.4   | 0.4   | 0.9                                                       |
|                                      | CO <sub>2</sub> | 0.5                                                                          | 0.5   | 0.5   | 0.5   | -0.5                                                      |
